# Supplementary material
Source: PubMed Central journal article supplement (PMC6544176)
Supplement: NIHMS1519878-supplement-1.pdf [file NIHMS1519878-supplement-1.pdf]

## SUPPLEMENTARY MATERIAL

Table S1

Figure S1 & S2

**Table S1. Leptogenic and Obesity Pharmacotherapy Medications Used by the Cohort**

| <b>Medication Class<br/>(n)</b> | <b>Leptogenic/Obesity<br/>Pharmacotherapy<br/>Medications (n)</b>     |
|---------------------------------|-----------------------------------------------------------------------|
| Leptogenic                      | Metformin (146)<br>Bupropion (81)<br>Exenatide (2)<br>Phentermine (1) |
| Obesity Pharmacotherapy         | Orlistat (13)<br>Liraglutide (6)                                      |

Figure S1

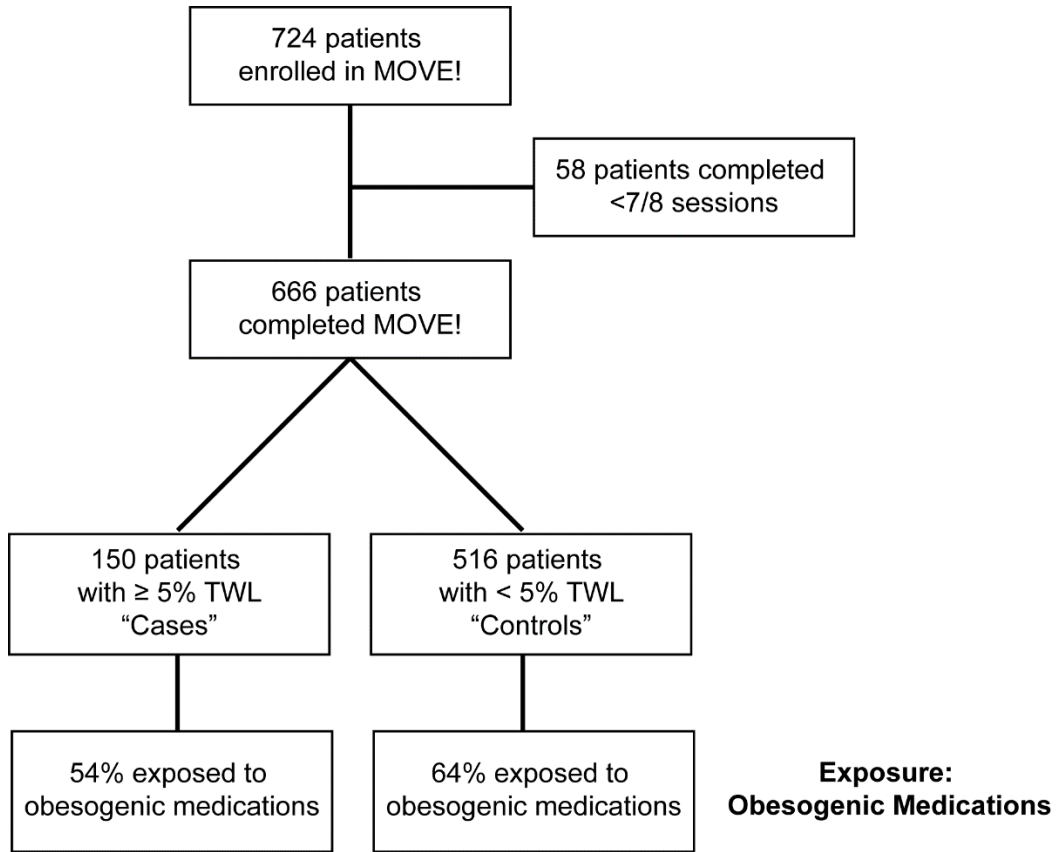

Design of case-control study investigating the relationship between obesogenic medications and response to a behavioral weight loss program (i.e. MOVE!)

Figure S2

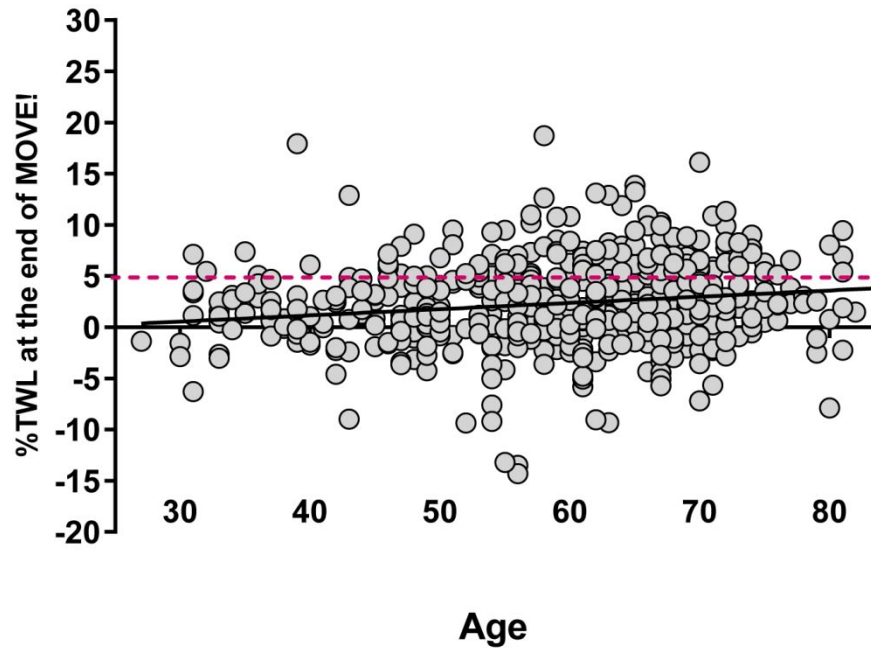

Plot of age and %TWL. Solid black line shows regression. Dashed red line shows 5% weight loss. Aged patients were more likely to attain 5% weight loss at the end of the MOVE! program. However, they were also more likely to gain weight in the program as well. Thus there was no correlation/relationship between age and TWL.
